# Supplementary material for: Clinical Factors and Outcomes When Real-World Heart Teams Overruled STS Risk Scores in TAVR Cases
Source: Hindawi journal article supplement (doi:10.1155/2022/9926423), 2022-06-25
Supplement: f1 [file 9926423.f1.zip]

Hospital: \_\_\_\_\_ Patient initials: \_\_\_\_\_ Patient DOB: \_\_\_\_\_ Date of TAVR Implant: \_\_\_\_\_

Please indicate which of the following clinical factors prompted your Heart Team to recommend TAVR despite an STS predicted mortality for isolated AVR of  $\leq 3.0\%$ . Please list all factors (and available qualifying information).

**Please also circle most important factor in this decision.**

- ☐ Frailty:                      ☐ 6m walk test \_\_\_\_ seconds                      ☐ Uses walker or cane  
                                    ☐ Wheelchair dependent                      ☐ Does not live independently  
                                    ☐ Malnutrition    list albumin level \_\_\_\_
- ☐ Extreme Body Habitus:      ☐ Obesity    ☐ Emaciation/small stature      list BMI \_\_\_\_
- ☐ Hostile Chest Anatomy:      ☐ Ascending aorta calcifications                      ☐ Previous chest radiation  
                                    ☐ Graft or RV under sternum    ☐ Previous sternal infection or nonunion  
                                    ☐ Other    list: \_\_\_\_\_
- ☐ Severe Pulmonary Disease:    list % Predicted FEV1 \_\_\_\_    list % Predicted DLCO \_\_\_\_  
                                            ☐ Supplemental Oxygen    ☐ Nocturnal BiPap
- ☐ Severe Pulmonary Hypertension:    list PA systolic pressure \_\_\_\_ mmHg
- ☐ Liver Disease:    Describe: \_\_\_\_\_
- ☐ High Risk of Stroke:    Describe: \_\_\_\_\_
- ☐ Bleeding Concern:                      ☐ Thrombocytopenia    ☐ Coagulopathy    ☐ Jehovah's Witness  
                                    Describe: \_\_\_\_\_
- ☐ Malignancy:    Describe: \_\_\_\_\_
- ☐ Need to undergo additional medical procedure in near future:  
                                    Describe: \_\_\_\_\_
- ☐ Other not listed above:  
                                    Describe: \_\_\_\_\_  
                                    \_\_\_\_\_

Please list additional relevant information regarding Heart Team's decision to recommend TAVR for this patient: \_\_\_\_\_

\_\_\_\_\_
