# Supplementary material for: Clinical Factors and Outcomes When Real-World Heart Teams Overruled STS Risk Scores in TAVR Cases
Source: J Interv Cardiol. 2022 Jun 25;2022:9926423. doi: 10.1155/2022/9926423 (PMC9252751; doi:10.1155/2022/9926423)
Supplement: Supplementary Materials — Details on the missing data and the survey data collection instrument that was used in this project are included as supplementary materials. [file 9926423.f1.zip]

Archive with 2 entries (2 files):
- 9926423.f1/ID 9926423 Supplement 1 (Missing Data).docx
- 9926423.f1/ID 9926423 Supplement 2 (Survey Tool).pdf
